# Supplementary material for: In situ synthesis of g-C3N4/Ti3C2Tx nano-heterostructures for enhanced photocatalytic H2 generation via water splitting
Source: Royal Society of Chemistry journal article supplement (doi:10.1039/d3ra07321a), 2023-01-01
Supplement: d3ra07321a1.pdf [file d3ra07321a1.pdf]

## Supporting Information

### ***In-situ* synthesis of g-C<sub>3</sub>N<sub>4</sub> /Ti<sub>3</sub>C<sub>2</sub>T<sub>x</sub> nano-heterostructures for enhanced photocatalytic H<sub>2</sub> generation via water splitting**

Amol B. Tambe,<sup>1</sup> Sudhir S. Arbuj, <sup>1,\*</sup> Govind G. Umarji,<sup>1</sup> Sulbha K. Kulkarni,<sup>1</sup> Bharat B. Kale<sup>1,2,\*</sup>

<sup>1</sup>*Centre for materials for Electronics Technology (C-MET), Minister of Electronic and Information Technology  
Off Pashan Road, Panchwati, Pune-411008, Maharashtra, India.*

<sup>2</sup>*MIT World Peace University (MIT-WPU), Paud Rd, Kothrud, Pune, Maharashtra 411038.*

*E-mail: sudhir1305@gmail.com / bbkale1@gmail.com*

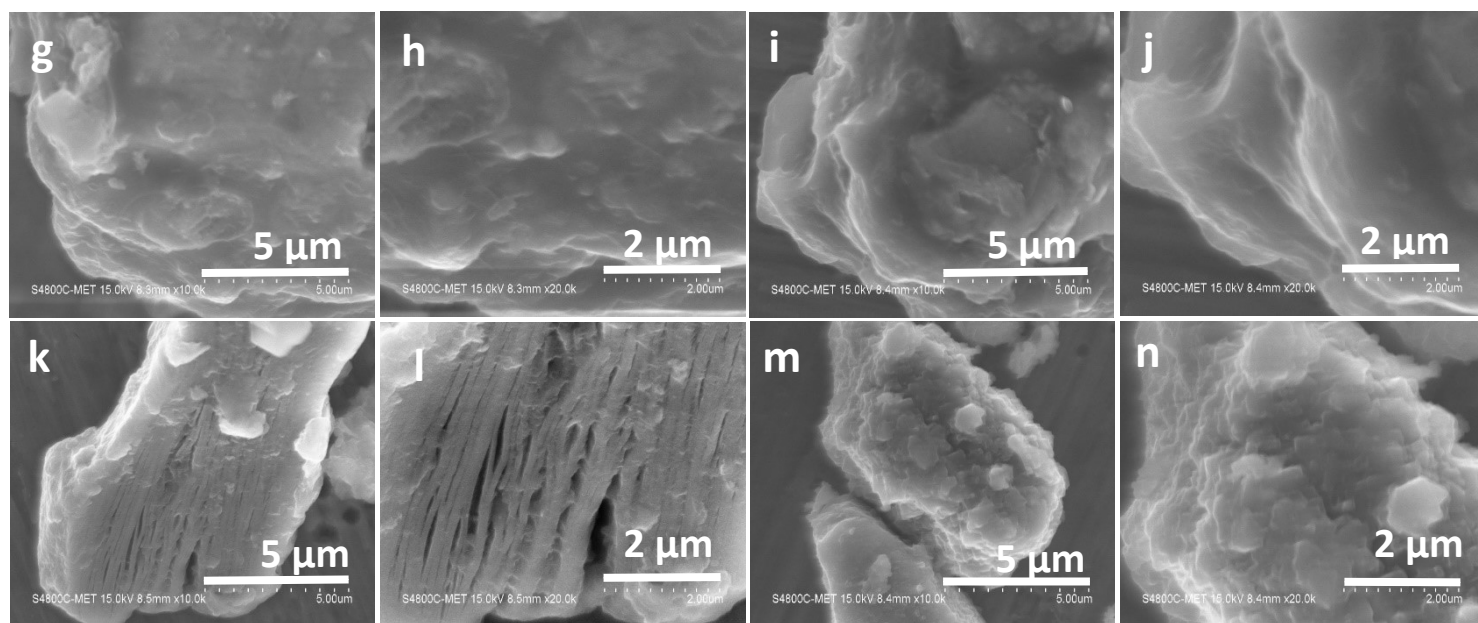

**Fig.S1** FESEM image of gCT-1(g, h), gCT-0.50(i, j), gCT-0.25(k, l), and gCT-0.05(m, n).

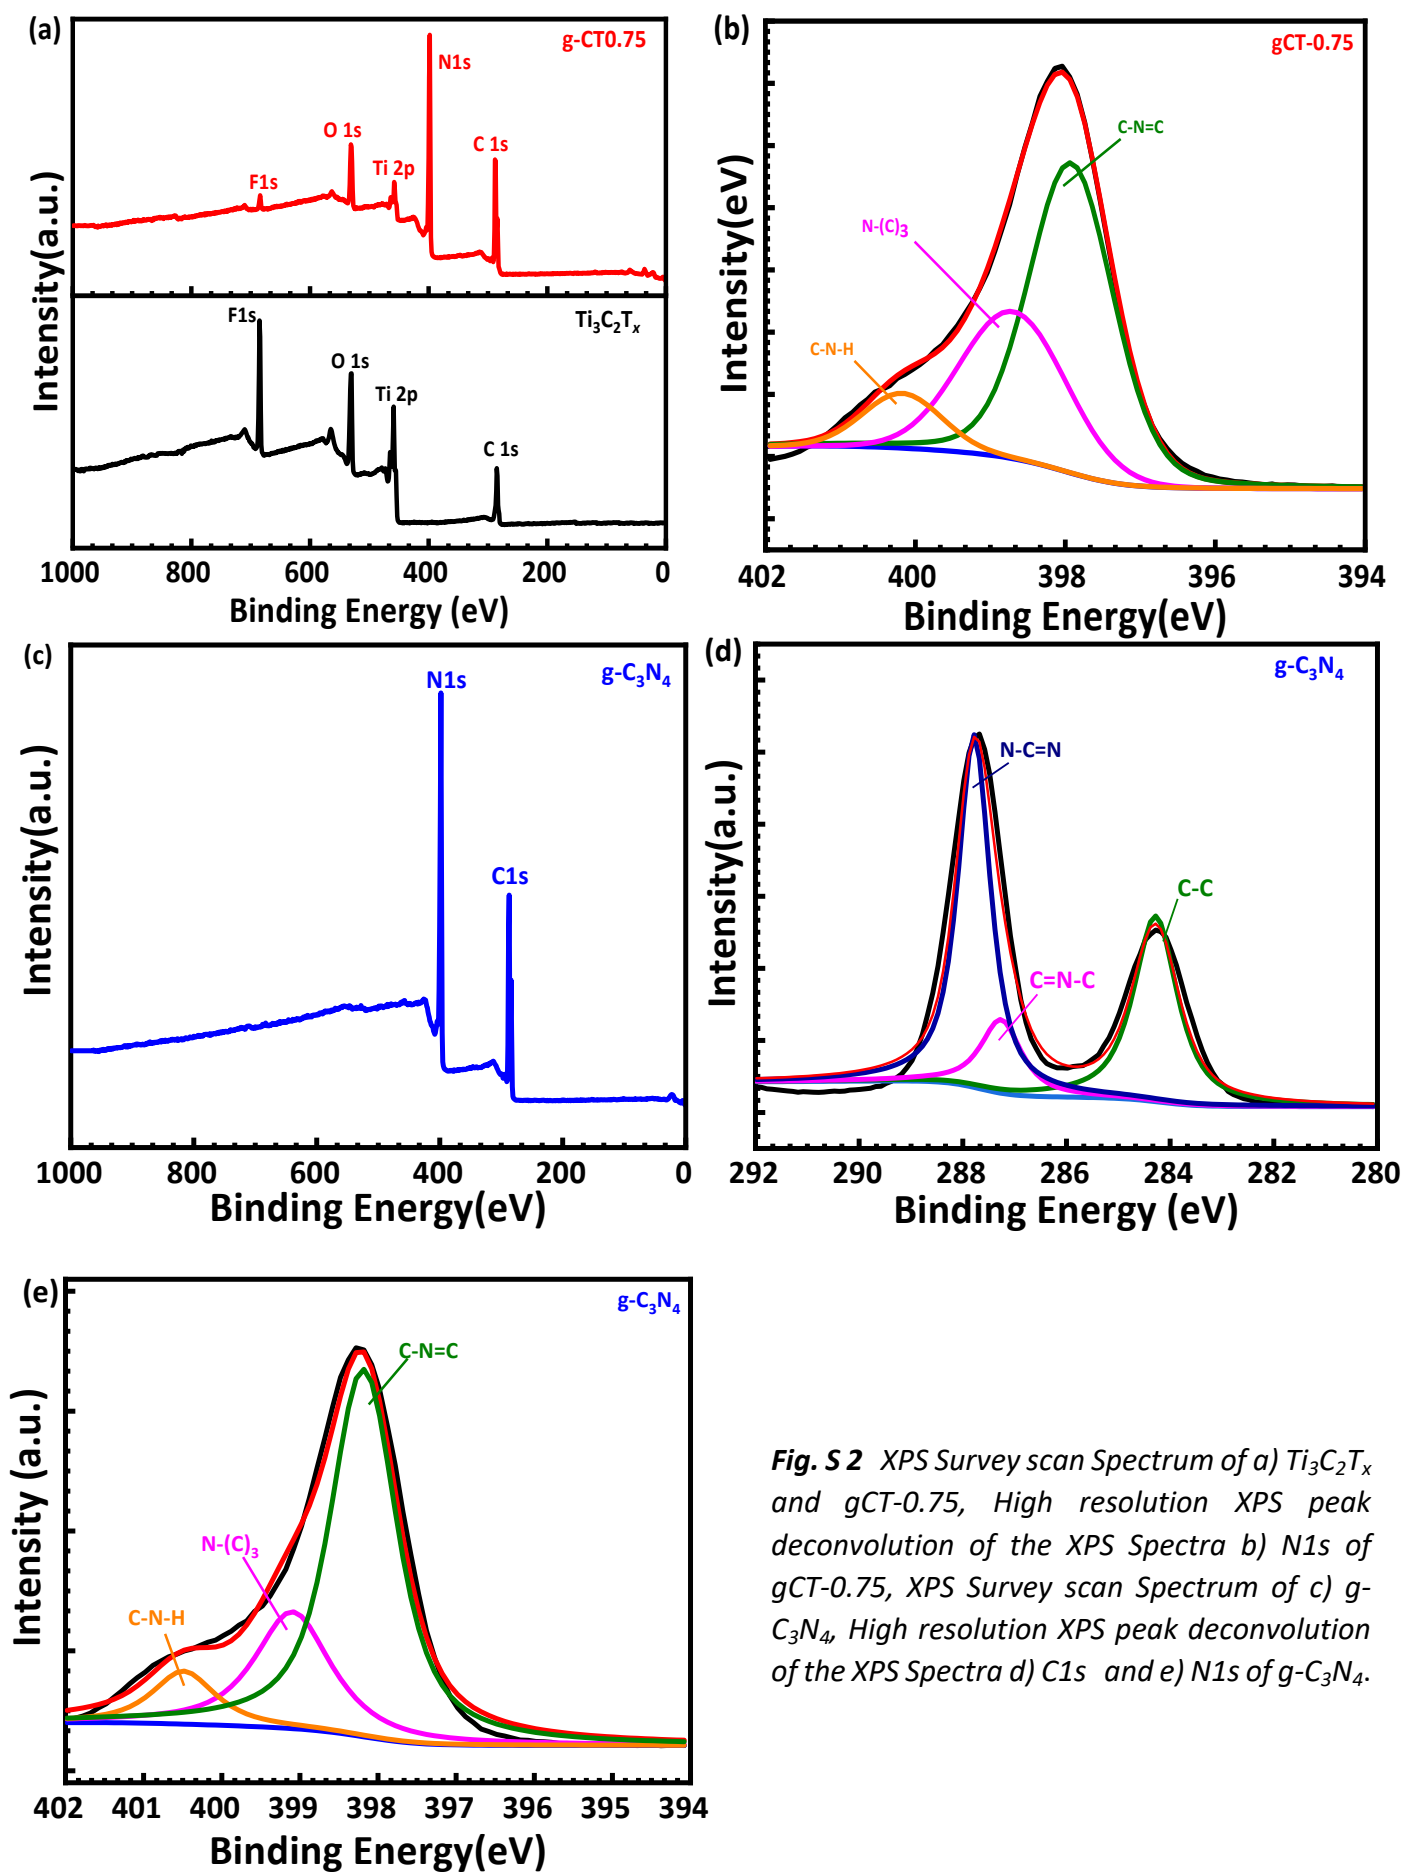

**Fig. S 2** XPS Survey scan Spectrum of a)  $Ti_3C_2T_x$  and  $gCT-0.75$ , High resolution XPS peak deconvolution of the XPS Spectra b) N1s of  $gCT-0.75$ , XPS Survey scan Spectrum of c)  $g-C_3N_4$ , High resolution XPS peak deconvolution of the XPS Spectra d) C1s and e) N1s of  $g-C_3N_4$ .

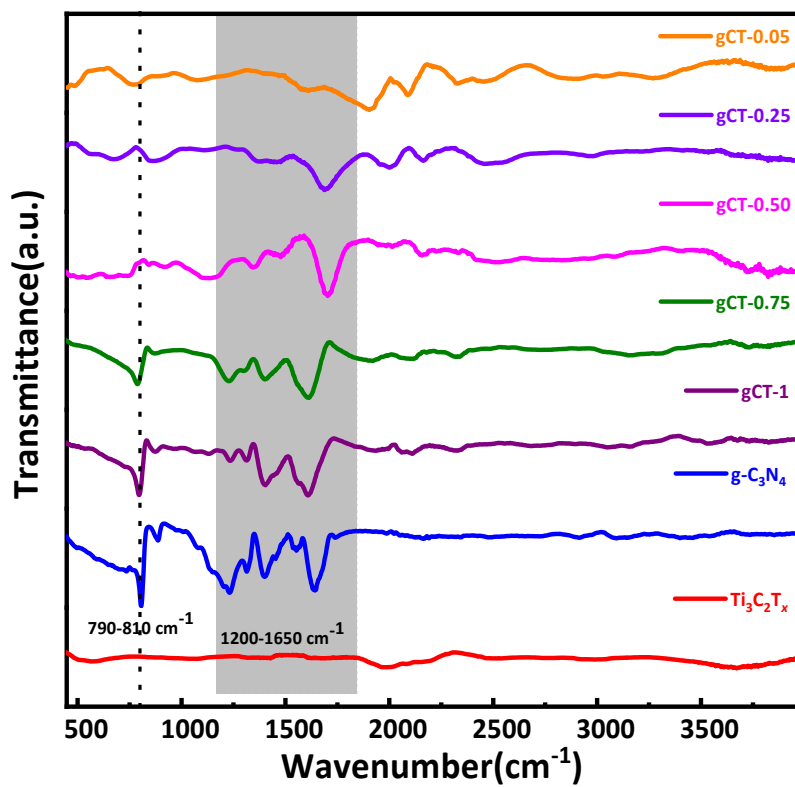

**Fig.S3** FTIR Spectra of  $Ti_3C_2T_x$ ,  $g-C_3N_4$ ,  $gCT-1$ ,  $gCT-0.75$ ,  $gCT-0.50$ ,  $gCT-0.25$ , and  $gCT-0.05$ .

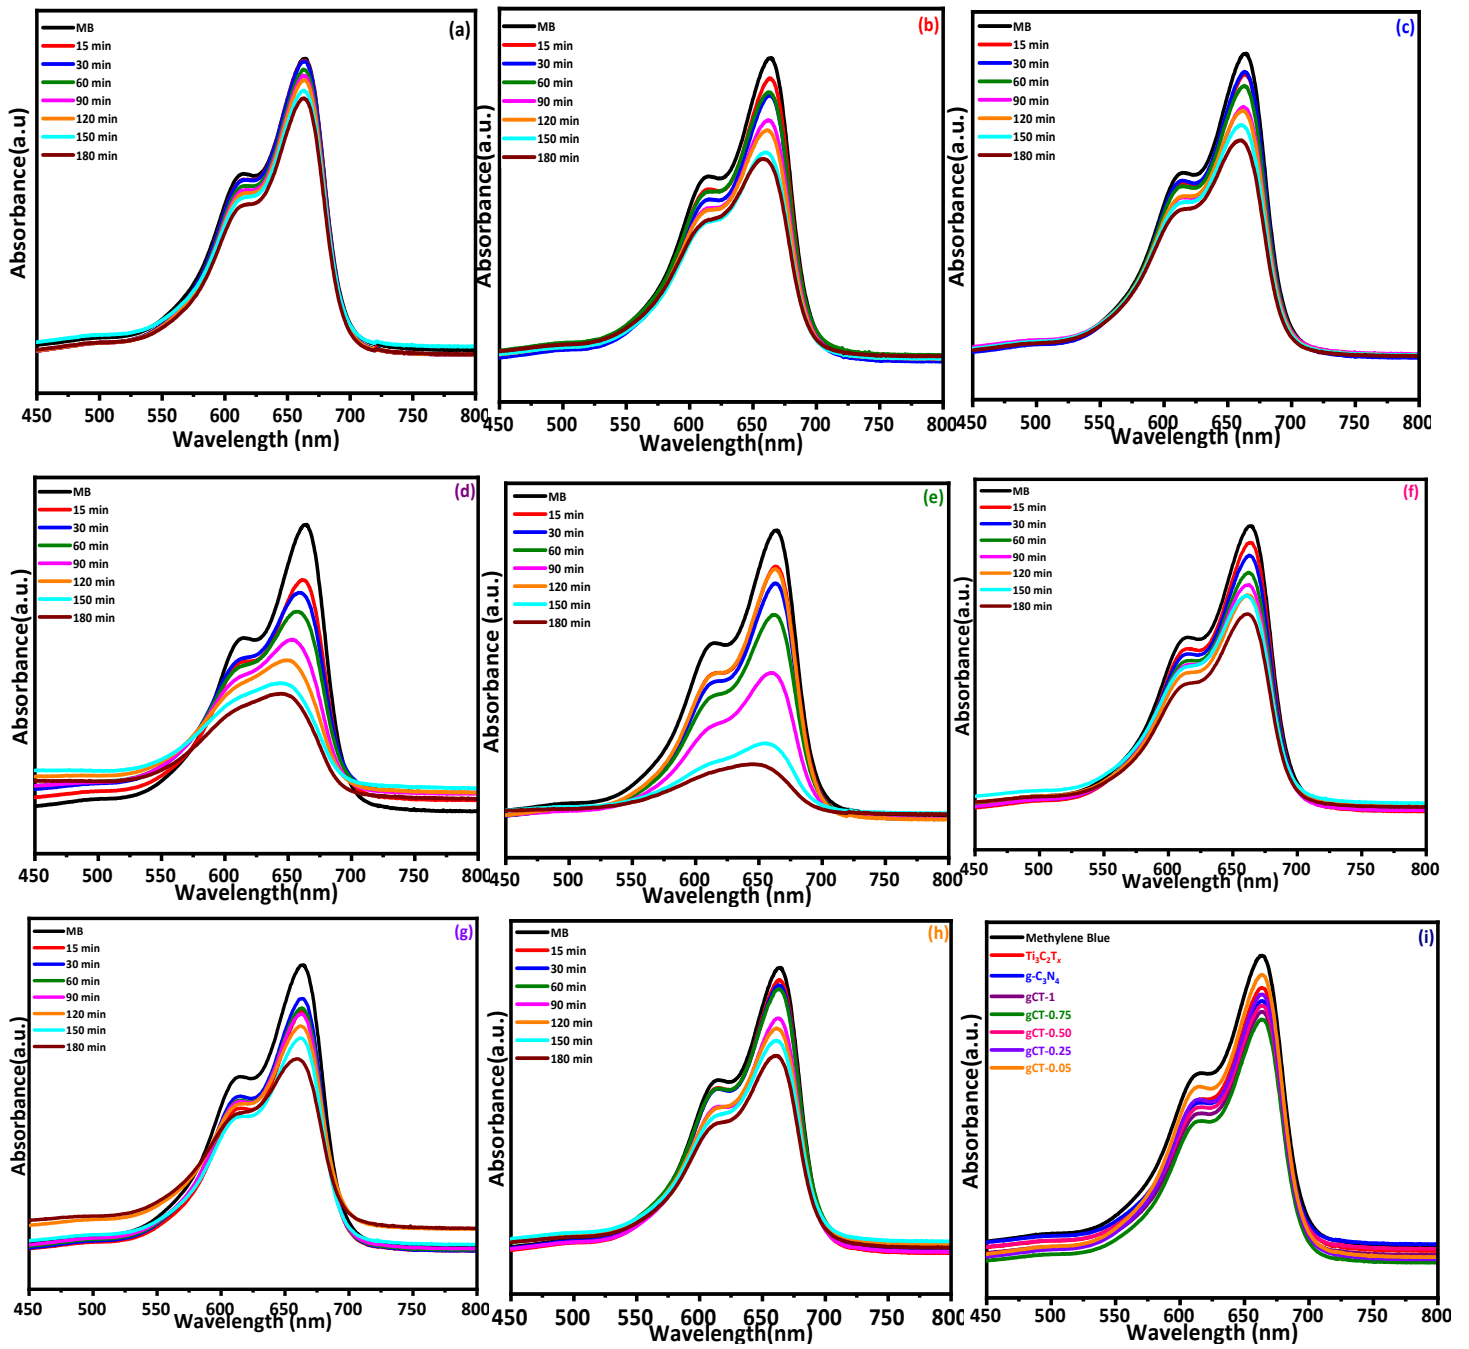

**Fig. S4** UV-Vis Absorbance spectra of (a) MB degradation under UV-Visible light (b)  $Ti_3C_2T_x$ , (c)  $g-C_3N_4$ , (d)  $gCT-1$ , (e)  $gCT-0.75$ , (f)  $gCT-0.50$ , (g)  $gCT-0.25$ , (h)  $gCT-0.05$  and (i) UV-Vis absorbance spectra of MB degradation under dark condition using  $Ti_3C_2T_x$ ,  $g-C_3N_4$  and its nano-heterostructure.

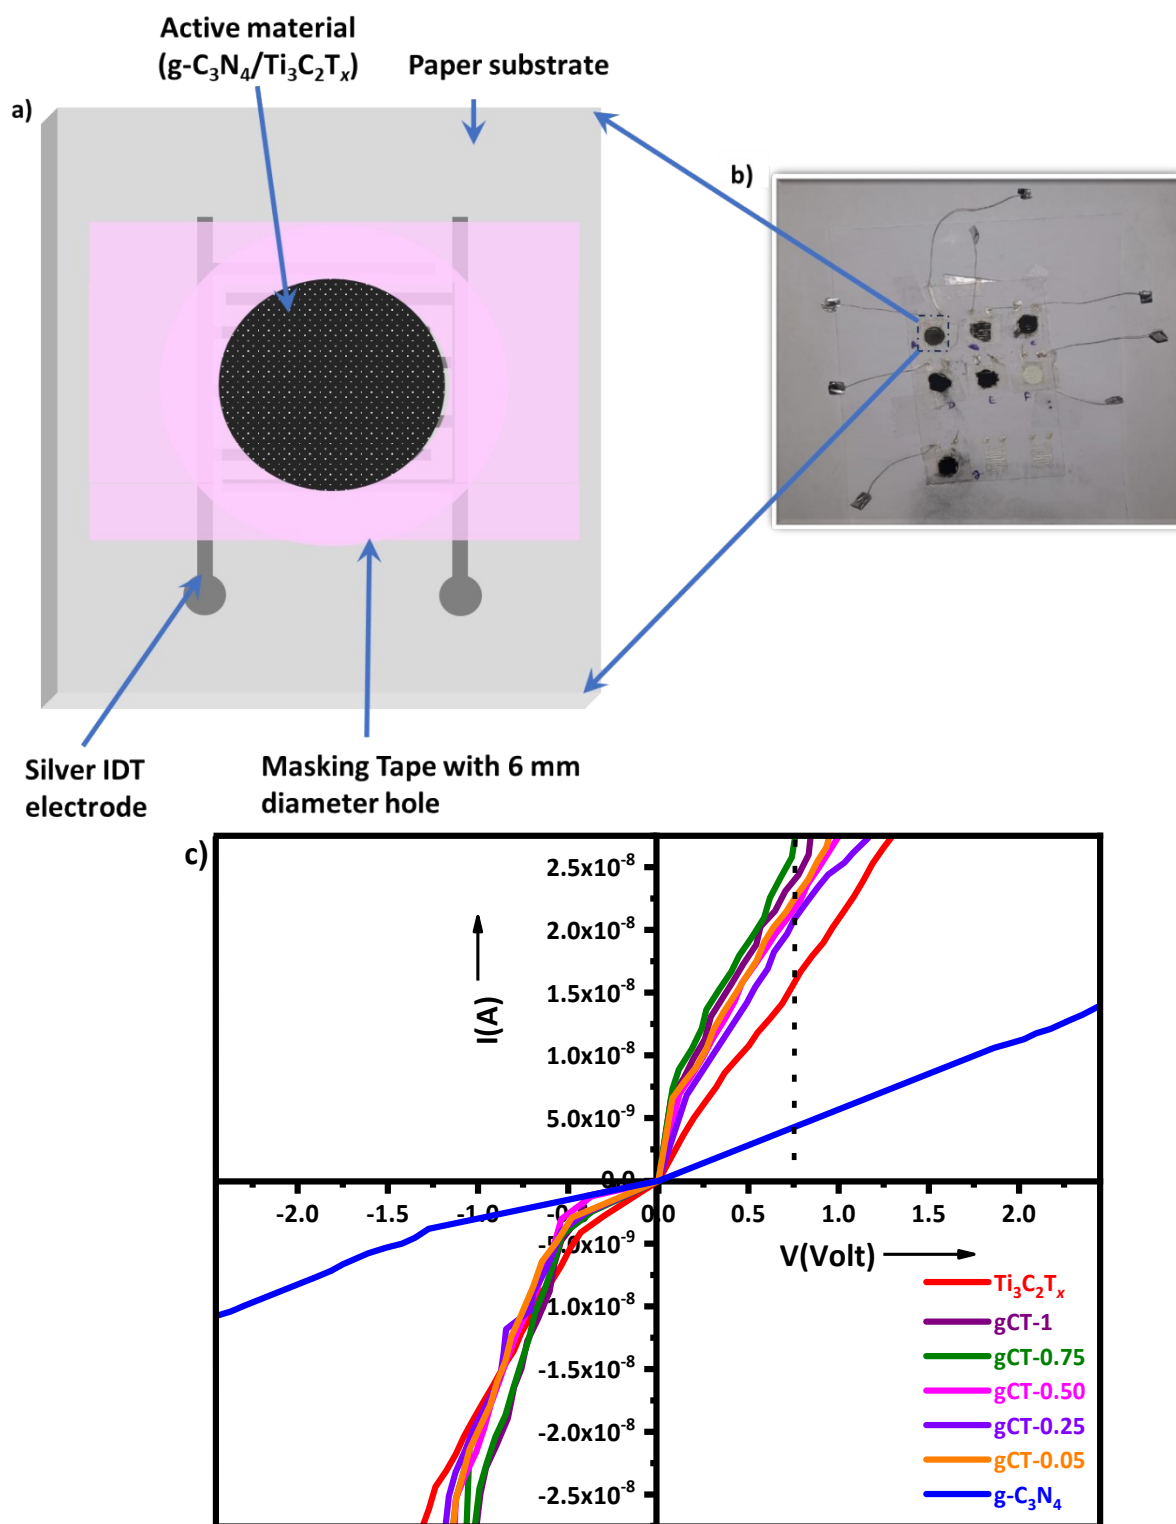

**Fig. S5** a) photo conductivity sample measurement design, b) Actual sample deposited, c) current –Voltage characteristics of Ti<sub>3</sub>C<sub>2</sub>T<sub>x</sub>, g-C<sub>3</sub>N<sub>4</sub>, gCT-1, gCT-0.75, gCT-0.50, gCT-0.25, and gCT-0.05.

**Table S1** XPS peak fitting results of a)  $Ti_3C_2T_x$ , b) gCT-0.75, c) g- $C_3N_4$ 

| a) | Region                                   | B.E.(eV)     | FWHM(eV) | Assigned                          | References |
|----|------------------------------------------|--------------|----------|-----------------------------------|------------|
|    |                                          | 454.6(460.3) | 0.7      | Ti-C                              | 1          |
|    |                                          | 455.4(461.3) | 0.8      | Ti <sup>2+</sup>                  | 2          |
|    | Ti2p <sub>3/2</sub> (2p <sub>1/2</sub> ) | 456.3(462.3) | 1.3      | Ti <sup>3+</sup>                  | 3          |
|    |                                          | 459.1(464.0) | 1.6      | Ti-O                              | 1          |
|    |                                          | 461.5(466.8) | 2.5      | C-Ti-T <sub>x</sub>               | 2          |
|    |                                          | 464.9        | 1.9      | TiO <sub>2-x</sub> T <sub>x</sub> | 1          |
|    |                                          | 281.6        | 1.0      | C-Ti                              | 2          |
|    |                                          | 284.4        | 1.1      | C-Ti-T <sub>x</sub>               | 1          |
|    | C 1s                                     | 285.0        | 1.0      | C-C                               | 2          |
|    |                                          | 286.1        | 1.6      | CH <sub>x</sub> /C-O              | 1          |
|    |                                          | 288.4        | 1.4      | C-F/-COO                          | 2          |
|    |                                          | 529.9        | 1.1      | TiO <sub>2</sub>                  | 1          |
|    |                                          | 530.7        | 1.1      | Ti-O <sub>x</sub>                 | 2          |
|    | O1s                                      | 531.8        | 1.2      | Ti-OH                             | 1          |
|    |                                          | 533.2        | 1.6      | Ti-H <sub>2</sub> O               | 2          |
|    | F 1s                                     | 684.7        | 1.3      | C-Ti-T <sub>x</sub>               | 1          |
|    |                                          | 685.7        | 1.5      | C-F                               | 2          |

  

| b) | Region                                      | B.E.(eV)     | FWHM(eV) | Assigned                          | References |
|----|---------------------------------------------|--------------|----------|-----------------------------------|------------|
|    |                                             | 454.3(460.0) | 1.0      | Ti-C                              | 1          |
|    |                                             | 455.9(461.8) | 1.5      | Ti <sup>2+</sup>                  | 2          |
|    | Ti2p <sub>3/2</sub><br>(2p <sub>1/2</sub> ) | 457.7(463.7) | 1.6      | Ti <sup>3+</sup>                  | 3          |
|    |                                             | 458.2(464.1) | 1.2      | Ti-O                              | 1          |
|    |                                             | 460.9(465.9) | 2.6      | C-Ti-T <sub>x</sub>               | 2          |
|    |                                             | 463.8        | 1.6      | TiO <sub>2-x</sub> T <sub>x</sub> | 1          |
|    |                                             | 281.0        | 0.5      | C-Ti                              | 2          |
|    |                                             | 284.5        | 1.2      | C-C                               | 1          |
|    | C 1s                                        | 286.8        | 1.8      | C-N=C                             | 2          |
|    |                                             | 287.8        | 1.2      | N-C=N                             | 1          |
|    |                                             | 397.9        | 0.9      | C-N=C                             | 1          |
|    | N 1s                                        | 398.8        | 1.5      | N-(C) <sub>3</sub>                | 1          |
|    |                                             | 400.2        | 1.4      | C-N-H                             | 1          |
|    |                                             | 529.3        | 1.2      | TiO <sub>2</sub>                  | 1          |
|    |                                             | 530.5        | 1.3      | Ti-O <sub>x</sub>                 | 2          |
|    | O1s                                         | 531.4        | 1.0      | Ti-OH                             | 1          |
|    |                                             | 532.4        | 1.1      | Ti-H <sub>2</sub> O               | 2          |
|    | F 1s                                        | 683.8        | 1.5      | C-Ti-T <sub>x</sub>               | 1          |
|    |                                             | 685.4        | 1.9      | C-F                               | 2          |

  

| c) | Region | B.E.(eV) | FWHM(eV) | Assigned           | References |
|----|--------|----------|----------|--------------------|------------|
|    |        | 284.2    | 1.0      | C-C                | 1          |
|    | C 1s   | 286.8    | 0.9      | C-N=C              | 2          |
|    |        | 287.8    | 0.8      | N-C=N              | 1          |
|    |        | 398.2    | 0.9      | C-N=C              | 1          |
|    | N1s    | 399.1    | 1.2      | N-(C) <sub>3</sub> | 1          |
|    |        | 400.5    | 0.9      | C-N-H              | 1          |

**Table S2.** Time Resolved Photoluminescence (TRPL) fitting parameters about fast PL lifetime ( $\tau_1$ ), slow PL lifetime ( $\tau_2$ ), and average lifetime ( $\tau_{ave}$ ) for  $Ti_3C_2T_x$ , gCT-0.75, g- $C_3N_4$ .

| Catalyst     | $A_1$ (%) | $\tau_1$ (ns) | $A_2$ (%) | $\tau_2$ (ns) | $\tau_{ave}$ (ns) |
|--------------|-----------|---------------|-----------|---------------|-------------------|
| $Ti_3C_2T_x$ | 91.3042   | 0.6801        | 8.9214    | 3.9214        | 1.8290            |
| gCT-0.75     | 84.0100   | 0.9723        | 15.9900   | 4.5923        | 2.7656            |
| g- $C_3N_4$  | 90.2382   | 0.7682        | 9.7618    | 4.0123        | 1.9390            |



**Table S3** Photocatalytic Hydrogen generation ( $\mu\text{mole}$  of  $\text{H}_2$  in 4h) of prepared  $\text{Ti}_3\text{C}_2\text{T}_x$ ,  $\text{g-C}_3\text{N}_4$ ,  $\text{gCT-1}$ ,  $\text{gCT-0.75}$ ,  $\text{gCT-0.50}$ ,  $\text{gCT-0.25}$ , and  $\text{gCT-0.05}$ .

| Time(h) | Amount of $\text{H}_2$ generated in $\mu\text{mol}/0.1\text{g}$ |                          |                |                   |                   |                   |                   |
|---------|-----------------------------------------------------------------|--------------------------|----------------|-------------------|-------------------|-------------------|-------------------|
|         | $\text{Ti}_3\text{C}_2\text{T}_x$                               | $\text{g-C}_3\text{N}_4$ | $\text{gCT-1}$ | $\text{gCT-0.75}$ | $\text{gCT-0.50}$ | $\text{gCT-0.25}$ | $\text{gCT-0.05}$ |
| 1       | 14.50                                                           | 212.22                   | 350.11         | 482.36            | 309.89            | 290.24            | 266.16            |
| 2       | 33.18                                                           | 429.41                   | 716.26         | 947.78            | 633.21            | 555.23            | 520.12            |
| 3       | 49.89                                                           | 642.83                   | 1040.65        | 1410.36           | 948.98            | 830.36            | 760.20            |
| 4       | 74.90                                                           | 860.98                   | 1410.21        | 1912.25           | 1296.23           | 1150.32           | 1021.23           |

**Table S4** Photocatalytic Hydrogen production using MXene/g-C<sub>3</sub>N<sub>4</sub>

| S. No. | Photocatalyst                                                                  | Light Source                  | Amount (mg) | Scavenger       | Photocatalytic activity<br>H <sub>2</sub> generation | Ref.      |
|--------|--------------------------------------------------------------------------------|-------------------------------|-------------|-----------------|------------------------------------------------------|-----------|
| 1      | Ti <sub>3</sub> C <sub>2</sub> /g-C <sub>3</sub> N <sub>4</sub>                | 200 W Hg lamp                 | 30          | triethanolamine | 72.3 μmol gcat <sup>-1</sup> h <sup>-1</sup>         | 1         |
| 2      | g-C <sub>3</sub> N <sub>4</sub> @Ti <sub>3</sub> C <sub>2</sub> QDs            | 300 W Xe arc lamp             | 10          | triethanolamine | 5111.8 μmol g <sup>-1</sup> h <sup>-1</sup>          | 2         |
| 3      | g-C <sub>3</sub> N <sub>4</sub> /Ti <sub>3</sub> C <sub>2</sub> T <sub>x</sub> | 350 W xenon lamp              | 30          | triethanolamine | 88 μmol /g.cat./h                                    | 3         |
| 4      | 2Dg-C <sub>3</sub> N <sub>4</sub> /2D TiO <sub>2</sub>                         | 300 W Xenon lamp source       | 30          | triethanolamine | 1840.83 mmol g <sup>-1</sup> L <sup>-1</sup>         | 4         |
| 5      | g-C <sub>3</sub> N <sub>4</sub> /Ti <sub>3</sub> C <sub>2</sub> /Pt            | 300 W Xe lamp                 | 30          | methanol        | 5100 μmol h <sup>-1</sup> g <sup>-1</sup>            | 5         |
| 6      | P doped g-C <sub>3</sub> N <sub>4</sub> /Ti <sub>3</sub> C <sub>2</sub>        | Xe lamp 300 W                 | 10          | TEOA            | 3600.5 μmol h <sup>-1</sup> g <sup>-1</sup>          | 6         |
| 7      | gCT-0.75                                                                       | 400 Mercury Vapour lamp       | 20          | Methanol        | 1912.25 μmol h <sup>-1</sup> 0.1g <sup>-1</sup>      | This work |
| 8      | g-C <sub>3</sub> N <sub>4</sub> /Ti <sub>3</sub> C <sub>2</sub>                | 300 W Xe lamp (λ > 420 nm)    | 50          | TEOA            | 116.2 μmol h <sup>-1</sup> g <sup>-1</sup>           | 7         |
| 9      | Ti <sub>3</sub> C <sub>2</sub> /O-doped g-C <sub>3</sub> N <sub>4</sub>        | 300 W Xe lamp                 | 10          | TEOA            | 25124 μmol h <sup>-1</sup> g <sup>-1</sup>           | 8         |
| 10     | CCNT-TO-0.6                                                                    | Xenon lamp 300 W              | 30          | TEOA            | 1840.8 μmol h <sup>-1</sup> g <sup>-1</sup>          | 9         |
| 11     | BNCN20                                                                         | Xenon lamp 300 W (λ > 420 nm) | 10          | TEOA            | 1941.7 μmol h <sup>-1</sup> g <sup>-1</sup>          | 10        |

**Table S5.** Hydrogen evolution rates  $Ti_3C_2T_x$ ,  $g-C_3N_4$ ,  $gCT-1$ ,  $gCT-0.75$ ,  $gCT-0.50$ ,  $gCT-0.25$ , and  $gCT-0.05$  and their corresponding apparent quantum yield (AQY).

| S.No. | Catalyst     | Amount of H <sub>2</sub> generated in<br>( $\mu$ mol/0.1g) | AQY(%) <sup>a</sup> |
|-------|--------------|------------------------------------------------------------|---------------------|
| 1     | $Ti_3C_2T_x$ | 74.90                                                      | 0.2                 |
| 2     | $g-C_3N_4$   | 860.98                                                     | 1.4                 |
| 3     | $gCT-1$      | 1410.21                                                    | 2.3                 |
| 4     | $gCT-0.75$   | 1912.25                                                    | 3.1                 |
| 5     | $gCT-0.50$   | 1296.23                                                    | 2.1                 |
| 6     | $gCT-0.25$   | 1150.32                                                    | 1.9                 |
| 7     | $gCT-0.05$   | 1021.23                                                    | 1.7                 |

a = the % AQE calculated using the H<sub>2</sub> generation values for 0.1 g catalyst per h.<sup>11</sup>

**Table S6** Amount of MB remain of prepared  $Ti_3C_2T_x$ ,  $g-C_3N_4$ ,  $gCT-1$ ,  $gCT-0.75$ ,  $gCT-0.50$ ,  $gCT-0.25$ , and  $gCT-0.05$ .

| Time(min) | MB    | $Ti_3C_2T_x$ | $g-C_3N_4$ | $gCT-1$ | $gCT-0.75$ | $gCT-0.50$ | $gCT-0.25$ | $gCT-0.05$ |
|-----------|-------|--------------|------------|---------|------------|------------|------------|------------|
| 0         | 100   | 100          | 100        | 100     | 100        | 100        | 100        | 100        |
| 15        | 90.58 | 87.99        | 81.27      | 80.28   | 74.84      | 80.78      | 80.50      | 80.23      |
| 30        | 88.98 | 83.75        | 76.77      | 64.51   | 60.49      | 67.71      | 73.32      | 74.59      |
| 60        | 86.96 | 77.54        | 70.25      | 54.20   | 50.59      | 57.84      | 62.59      | 65.20      |
| 90        | 85.72 | 67.14        | 60.68      | 42.95   | 39.8       | 46.61      | 52.79      | 53.13      |
| 120       | 83.39 | 59.54        | 53.60      | 33.42   | 30.10      | 37.56      | 41.85      | 48.68      |
| 150       | 82.66 | 56.95        | 45.68      | 21.95   | 16.43      | 31.56      | 36.47      | 41.95      |
| 180       | 81.60 | 47.69        | 36.91      | 15.30   | 8.30       | 21.72      | 27.41      | 32.60      |

**Table S7** Photocatalytic MB degradation  $Ti_3C_2T_x/g-C_3N_4$ .

| S.No. | Photocatalyst                     | Light source            | Amount (mg) | Dye | Dye con( $\mu$ m) | Photocatalytic activity %Dye degradation | Ref.      |
|-------|-----------------------------------|-------------------------|-------------|-----|-------------------|------------------------------------------|-----------|
| 1     | facile modification of $g-C_3N_4$ | 400W halogen lamp       | 80          | MB  | 20                | 85.5                                     | 12        |
| 2     | $C_3N_4/Cu_2O$                    | 400 W sodium vapor lamp | 50          | MB  | 10                | 81                                       | 13        |
| 3     | MXene/ $g-C_3N_4$                 | 500 W halogen lamp      | 50          | MB  | 20                | 69.9                                     | 14        |
| 4     | gCT-0.75                          | 400 Mercury Vapour Lamp | 50          | MB  | 30                | 91.7                                     | This work |
| 5     | $Ti_3C_2T_x$ /alkalized- $C_3N_4$ | 300 W Xe lamp           | 10          | MB  | 20                | 77                                       | 15        |

## Photoconductivity Measurements by I-V

To support the higher photocatalytic activity of gCT-0.75, the photoconductivity measurements of  $\text{Ti}_3\text{C}_2\text{T}_x$ ,  $\text{g-C}_3\text{N}_4$ , gCT-1, gCT-0.75, gCT-0.50, gCT-0.25, and gCT-0.05 were carried out and the obtained current-voltage characteristics are depicted in (Supporting information Fig. S5 c). For photoconductivity measurement, the construction schematic is illustrated in (Supporting information Fig. S5 a).  $\text{Ti}_3\text{C}_2\text{T}_x$  nanostructured powder films deposited on pre-patterned silver (CI1001, ECM USA) inter-digitated electrode (jet-printed using Nordson PICO Pulse contact dispensing valve printer) on paper (Substrate). The inter-electrode spacing of 200  $\mu\text{m}$  between electrodes was maintained with a total path length of 30 mm. The 6 mm open diameter mask was pasted on the pre-patterned silver electrode to ensure the same area of powder films deposited for each photoconductivity measurement. The dispersed powder concentration was maintained the same for all samples throughout the photoconductivity measurement experiment (Supporting information Fig. S5 b). The measurements were performed using a kelvin probe connected to spring-loaded pressure contacts at room temperature. The entire setup was maintained in the metallic chamber (shield) in order to reduce the electrical noise effect.<sup>16,17</sup> I-V measurements were carried out using Keithley 4200 semiconductor characterization system (SCS) integrated with photo-emission system (1000 W xenon lamp and 1.5AM (air mass ratio)). All sample measurements were taken with voltage bias from -2.5 V to + 2.5 V under the illumination of light for all synthesized sample.<sup>18,19</sup> The  $\text{Ti}_3\text{C}_2\text{T}_x$ , gCT-1, gCT-0.50, gCT-0.25, and gCT-0.05 show relatively less photocurrent ( in the range of  $2.42\text{-}1.38 \times 10^{-8}$  A) compared to gCT-0.75 as shown in the range of  $2.73 \times 10^{-8}$  A) at applied bias of 0.75 V. The  $\sim 2$  time's enhanced photoconductivity is observed for the gCT-0.75 than the other prepared catalyst and  $\sim 6$  times than that of  $\text{g-C}_3\text{N}_4$  ( $4.23 \times 10^{-9}$  A). This photoconductivity result is in accordance with the higher photocatalytic performance of gCT-0.75 among prepared catalysts.

## References

1. T. Su, Z. D. Hood, M. Naguib, L. Bai, S. Luo and C. M. Rouleau, I. N. Ivanov, H. Ji and Z. Qin ZiliWu, *Nanoscale*, 2019, **11**, 8138-8149.
2. Y. Li, L. Ding, Y. Guo, Z. Liang, H. Cui, and J. Tian, *ACS Appl. Mater. Interfaces*. 2019, **11** (44), 41440-41447.
3. Y. Sun, D. Jin, Y. Sun, X. Meng, Y. Gao, Y. D. Agnese, C. Gang and X. Wang, *J. Mater. Chem. A*, 2018, **6**, 9124-9131.
4. J. Liu, H. Zhou, J. Fan and Q. Xiang, *Int. J. Hydrog. Energy*, 2022, **47**, 4546-4558.
5. X. An, W. Wang, J. Wang, H. Duan, J. Shi, X. Yu, *Phys. Chem. Chem. Phys.* 2018, **20**, 11405-11411.
6. Z. Ai, Y. Shao, B. Chang, L. Zhang, J. Shen, Y. Wu, B. Huang and X. Hao, *Appl. Catal., B* 2019, **259**, 118077.
7. J. Li, L. Zhao, S. Wang, J. Li, G. Wang and J. Wang, *Appl. Surf. Sci.*, 2020, **515**, 145922.
8. P. Lin, J. Shen, X. Yu, Q. Liu, D. Li and H. Tang, *Ceram. Int.*, 2019, **45**, 24656-24663.
9. J. Liu, H. Zhou, J. Fan and Q. Xiang, *Int. J. Hydrog. Energy*, 2022, **47**(7), 4546-4558.
10. H. Dang, S. Mao, Q. Li, M. Li, M. Shao, W. Wang and Q. Liu, *Catal. Sci. Technol.*, 2022, **12**, 5032.
11. T. Su, Z. D. Hood, M. Naguib, L. Bai, S. Luo, C. M. Rouleau, I. N. Ivanov, H. Ji, Z. Qin and Z. Wu, *ACS Appl. Energy Mater.*, 2019, **2**, 4640-4651.
12. F. Changa, Y. Xie, C. Li, J. Chen, J. Luo, X. Hu, J. Shen, *Appl. Surf. Sci.*, 2013, **280**, 967-974.
13. G. R. Surikanti, P. Bajaj, and M. V. Sunkara, *ACS Omega*, 2019, **4**(17), 17301-17316
14. M. Nasri, M. Samsudin, A. Tahir and S. Sufian, *Energies*, 2022, **15**, 955.
15. Y. Xuanying, Y. Jili, T. Haifang, D. Yi, H. Bashir, Y. Kai, C. Yuqing, Liu Xia, *J. Colloid Interface Sci.*, 2020, **571**, 297-306.
16. M. Zhang, J. Qin, S. Rajendran, X. Zhang and R. Liu, *Chem. Sus. Chem.*, 2018, **11**, (24), 4226-4236.
17. H. Yu, H. Ma, X. Wu, X. Wang, J. Fan and J. Yu, *Solar Photocatalysis*, 2021, **5**, (2), 2000372.
18. J. Liu, H. Zhou, J. Fan and Q. Xiang, *Int. J. Hydrog. Energy*, 2022, **47**, 7, 4546-4558.
19. N. Jawale, S. Arbu, G. Umarji, M. Shinde, B. Kale and S. B. Rane, *RSC Adv.*, 2023, **13**, 2418-2426.
